# Supplementary material
Source: publisher figshare collection journal article supplement (https://acs.figshare.com/ndownloader/files/3733615)
Supplement: Supplementary file 1 [file 3733615]

## Supporting Information

# Photoinduced Electron Transfer from Various Aniline Derivatives to Graphene Quantum Dots

*Tufan Ghosh, Swarupa Chatterjee and Edamana Prasad\**

Department of Chemistry, Indian Institute of Technology Madras, Chennai 600 036, India

| <b>Table of Contents</b>                                                                                                     | <b>Page No.</b> |
|------------------------------------------------------------------------------------------------------------------------------|-----------------|
| <b>Figure S1:</b> UV-visible absorption spectra of GQDs in DMF with increasing concentration of aniline                      | S4              |
| <b>Figure S2:</b> UV-visible absorption spectra of GQDs in DMF with increasing concentration of N-methylaniline              | S4              |
| <b>Figure S3:</b> UV-visible absorption spectra of GQDs in DMF with increasing concentration of <i>N,N'</i> -dimethylaniline | S5              |
| <b>Figure S4:</b> UV-visible absorption spectra of GQDs in DMF with increasing concentration of <i>N</i> -ethylaniline       | S5              |
| <b>Figure S5:</b> UV-visible absorption spectra of GQDs in DMF with increasing concentration of <i>N,N'</i> -diethylaniline  | S6              |
| <b>Figure S6:</b> UV-visible absorption spectra of GQDs in DMF with increasing concentration of <i>N,N'</i> -diphenylaniline | S6              |

|                                                                                                                                   |     |
|-----------------------------------------------------------------------------------------------------------------------------------|-----|
| <b>Figure S7:</b> Steady-state luminescence spectra of GQDs in DMF with increasing concentration of aniline                       | S7  |
| <b>Figure S8:</b> Steady-state luminescence spectra of GQDs in DMF with increasing concentration of <i>N,N'</i> -dimethylaniline  | S7  |
| <b>Figure S9:</b> Steady-state luminescence spectra of GQDs in DMF with increasing concentration of <i>N,N'</i> -diethylaniline   | S8  |
| <b>Figure S10:</b> Steady-state luminescence spectra of GQDs in DMF with increasing concentration of <i>N,N'</i> -diphenylaniline | S8  |
| <b>Figure S11:</b> Stern-Volmer plot for steady-state luminescence quenching of GQDs in presence of aniline                       | S9  |
| <b>Figure S12:</b> Stern-Volmer plot for steady-state luminescence quenching of GQDs in presence of <i>N,N'</i> -dimethylaniline  | S9  |
| <b>Figure S13:</b> Stern-Volmer plot for steady-state luminescence quenching of GQDs in presence of <i>N,N'</i> -diethylaniline   | S10 |
| <b>Figure S14:</b> Stern-Volmer plot for steady-state luminescence quenching of GQDs in presence of <i>N,N'</i> -diphenylaniline  | S10 |
| <b>Figure S15:</b> Time-resolve luminescence decay plot of GQDs in presence of aniline                                            | S11 |
| <b>Figure S16:</b> Time-resolve luminescence decay plot of GQDs in presence of <i>N,N'</i> -dimethylaniline                       | S11 |
| <b>Figure S17:</b> Time-resolve luminescence decay plot of GQDs in presence of <i>N,N'</i> -diethylaniline                        | S12 |
| <b>Figure S18:</b> Time-resolve luminescence decay plot of GQDs in presence of <i>N,N'</i> -diphenylaniline                       | S12 |

|                                                                                                                                              |     |
|----------------------------------------------------------------------------------------------------------------------------------------------|-----|
| <b>Table S1:</b> Table containing luminescence lifetime values of GQDs in presence of various concentrations of aniline                      | S13 |
| <b>Table S2:</b> Table containing luminescence lifetime values of GQDs in presence of various concentrations of <i>N,N'</i> -dimethylaniline | S13 |
| <b>Table S3:</b> Table containing luminescence lifetime values of GQDs in presence of various concentrations of <i>N,N'</i> -diethylaniline  | S14 |
| <b>Table S4:</b> Table containing luminescence lifetime values of GQDs in presence of various concentrations of <i>N,N'</i> -diphenylaniline | S14 |
| <b>Figure S19:</b> Transient difference absorption spectra GQDs (0.5 mg/mL) in presence of aniline                                           | S15 |
| <b>Figure S20:</b> Transient difference absorption spectra GQDs (0.5 mg/mL) in presence of <i>N,N'</i> -dimethylaniline                      | S15 |
| <b>Figure S21:</b> Transient difference absorption spectra GQDs (0.5 mg/mL) in presence of <i>N</i> -ethylaniline                            | S16 |
| <b>Figure S22:</b> Transient difference absorption spectra GQDs (0.5 mg/mL) in presence of <i>N,N'</i> -diethylaniline                       | S16 |
| <b>Figure S23:</b> Transient difference absorption spectra GQDs (0.5 mg/mL) in presence of <i>N,N'</i> -diphenylaniline                      | S17 |
| <b>Figure S24:</b> Transient decay trace probed at 430 nm for GQDs-NMA system in DMF                                                         | S17 |
| <b>Figure S25:</b> Transient decay trace probed at 425 nm for GQDs-NEA system in DMF                                                         | S18 |
| <b>Figure S26:</b> Transient decay trace probed at 455 nm for GQDs-DEAN system in DMF                                                        | S18 |
| <b>Figure S27:</b> Steady-state luminescence spectra of GQDs in presence of various aniline derivatives at acidic pH (pH~2).                 | S19 |

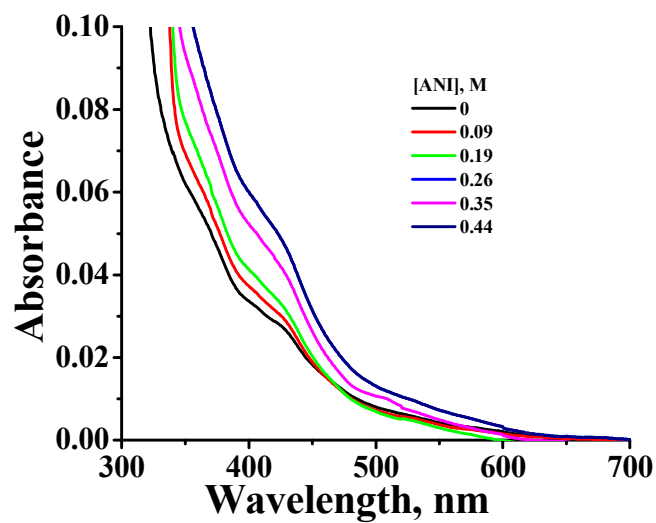

**Figure S1.** UV-visible absorption spectra of GQDs in DMF with increasing concentration of aniline. [GQDs]: 0.25 mg/mL and concentration of aniline is shown in inset.

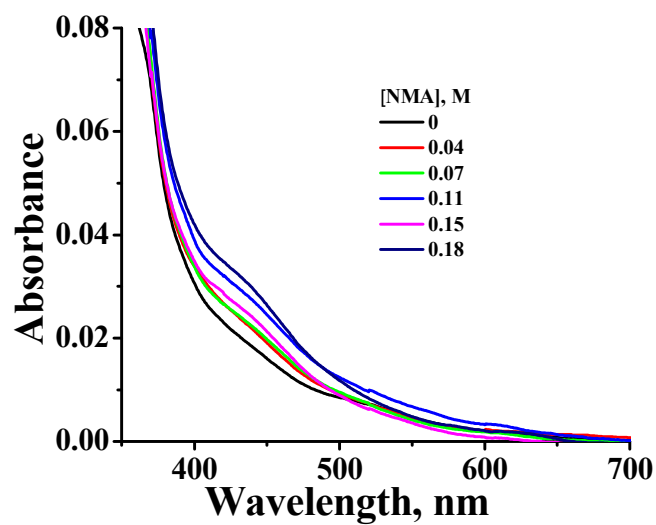

**Figure S2.** UV-visible absorption spectra of GQDs in DMF with increasing concentration of *N*-methylaniline. [GQDs]: 0.25 mg/mL and concentration of *N*-methylaniline is shown in inset

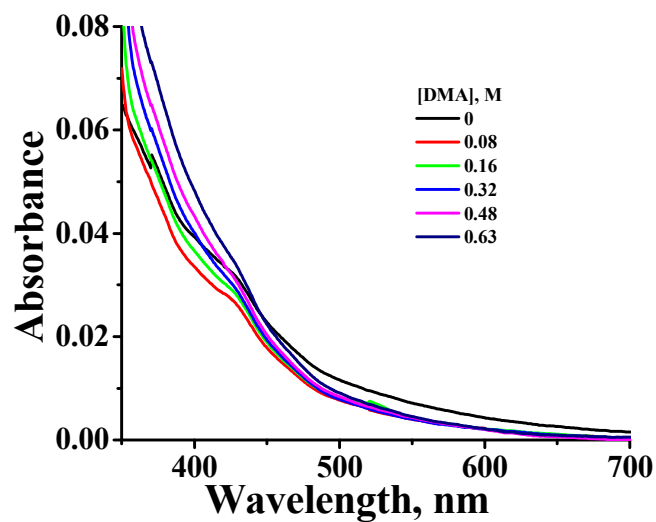

**Figure S3.** UV-visible absorption spectra of GQDs in DMF with increasing concentration of *N,N'*-dimethylaniline. [GQDs]: 0.25 mg/mL and concentration of *N,N'*-dimethylaniline is shown in inset.

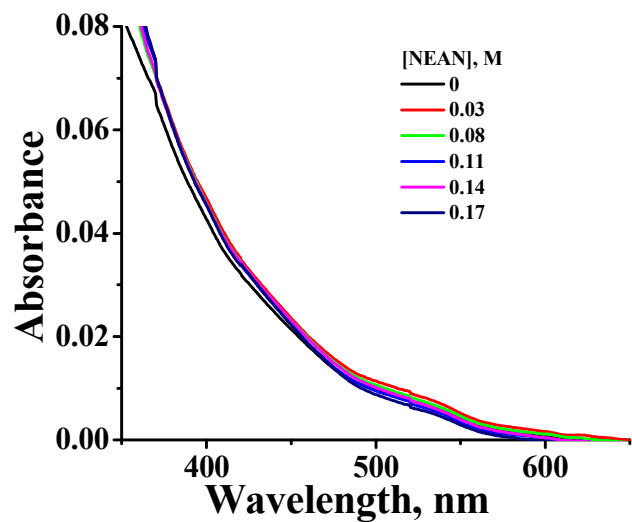

**Figure S4.** UV-visible absorption spectra of GQDs in DMF with increasing concentration of *N*-ethylaniline. [GQDs]: 0.25 mg/mL and concentration of *N*-ethylaniline is shown in inset

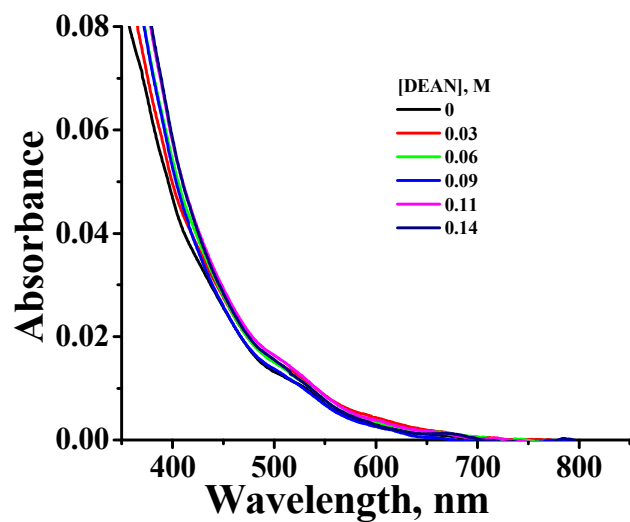

**Figure S5.** UV-visible absorption spectra of GQDs in DMF with increasing concentration of *N,N'*-diethylaniline. [GQDs]: 0.25 mg/mL and concentration of *N,N'*-diethylaniline is shown in inset.

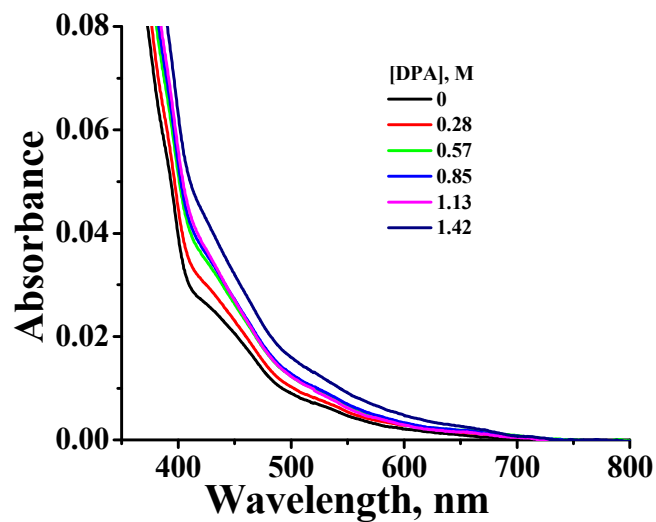

**Figure S6.** UV-visible absorption spectra of GQDs in DMF with increasing concentration of *N,N'*-diphenylaniline. [GQDs]: 0.25 mg/mL and concentration of *N,N'*-diphenylaniline is shown in inset.

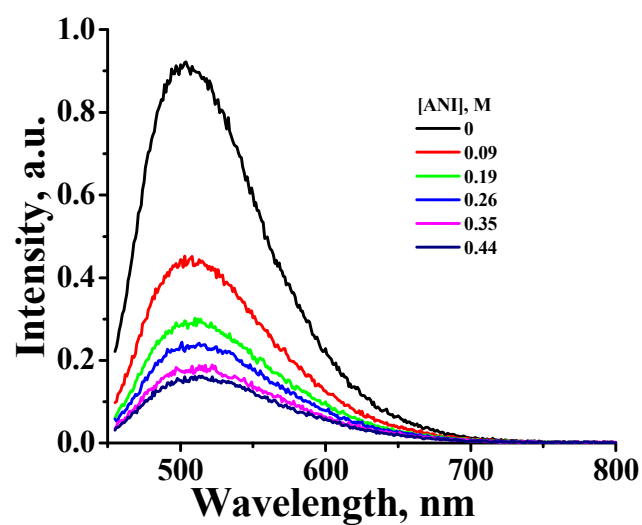

**Figure S7.** Steady-state luminescence spectra of GQDs in DMF with increasing concentration of aniline. [GQDs]: 0.25 mg/mL;  $\lambda_{\text{ex}}$  = 440 nm.

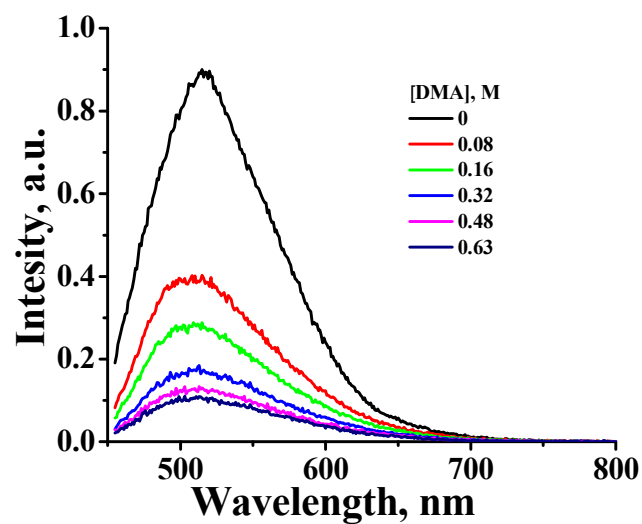

**Figure S8.** Steady-state luminescence spectra of GQDs in DMF with increasing concentration of *N,N'*-dimethylaniline. [GQDs]: 0.25 mg/mL;  $\lambda_{\text{ex}}$  = 440 nm.

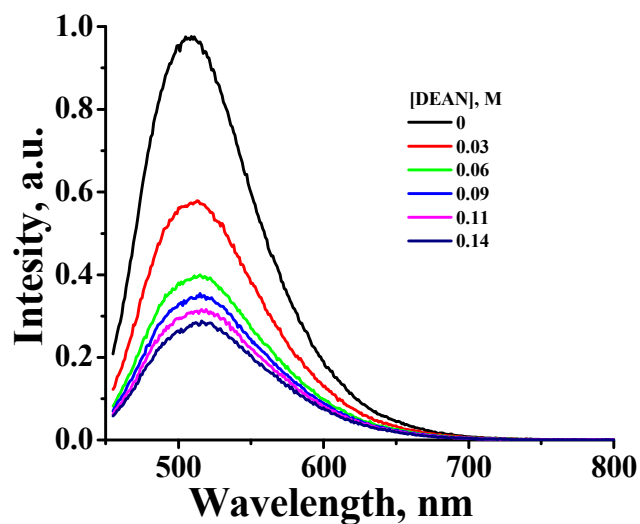

**Figure S9.** Steady-state luminescence spectra of GQDs in DMF with increasing concentration of *N,N'*-diethylaniline. [GQDs]: 0.25 mg/mL;  $\lambda_{\text{ex}}$  = 440 nm.

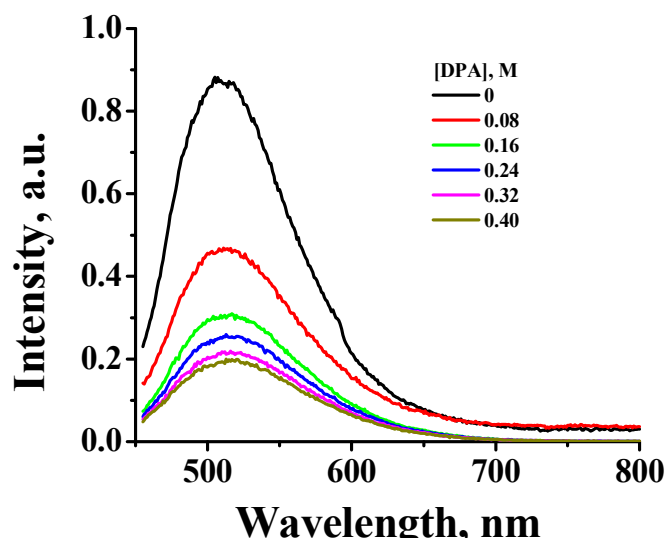

**Figure S10.** Steady-state luminescence spectra of GQDs in DMF with increasing concentration of *N,N'*-diphenylaniline. [GQDs]: 0.25 mg/mL;  $\lambda_{\text{ex}}$  = 440 nm.



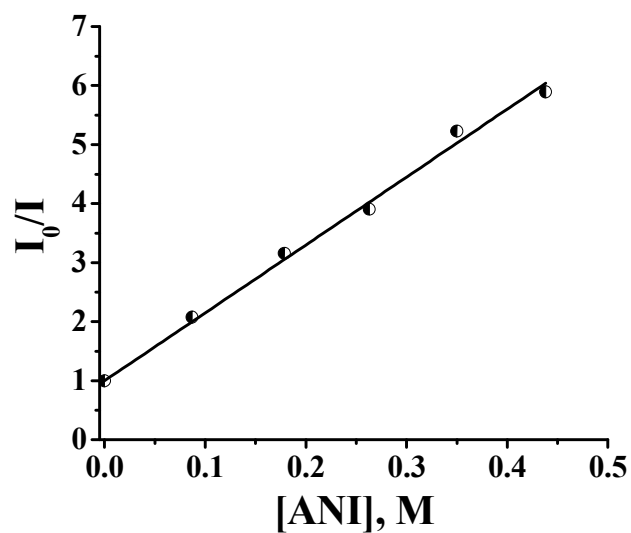

**Figure S11.** Stern-Volmer plot for steady-state luminescence quenching of GQDs in presence of aniline. [GQDs]: 0.25 mg/mL;  $\lambda_{\text{ex}}$  = 440 nm,  $\lambda_{\text{em}}$  = 510 nm.

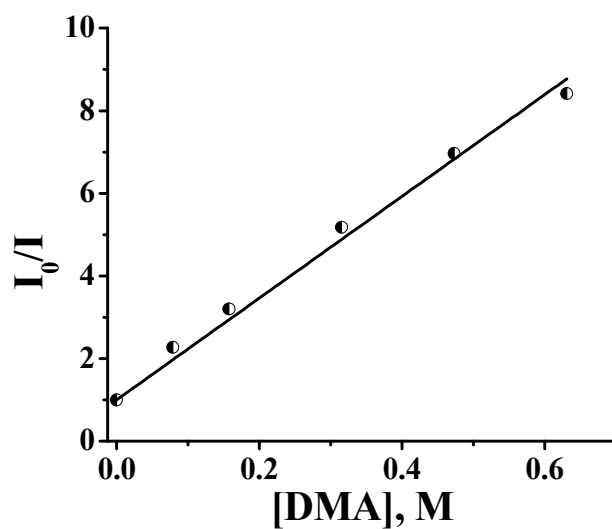

**Figure S12.** Stern-Volmer plot for steady-state luminescence quenching of GQDs in presence of *N,N'*-dimethylaniline. [GQDs]: 0.25 mg/mL;  $\lambda_{\text{ex}}$  = 440 nm,  $\lambda_{\text{em}}$  = 510 nm.

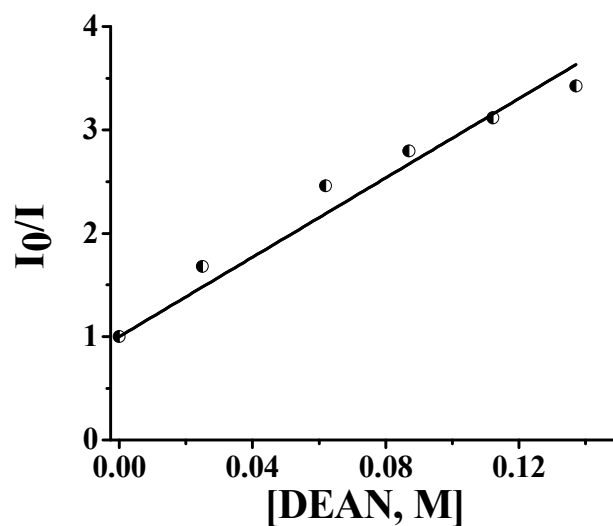

**Figure S13.** Stern-Volmer plot for steady-state luminescence quenching of GQDs in presence of  $N,N'$ -diethylaniline. [GQDs]: 0.25 mg/mL;  $\lambda_{ex}$  = 440 nm,  $\lambda_{em}$  = 510 nm.

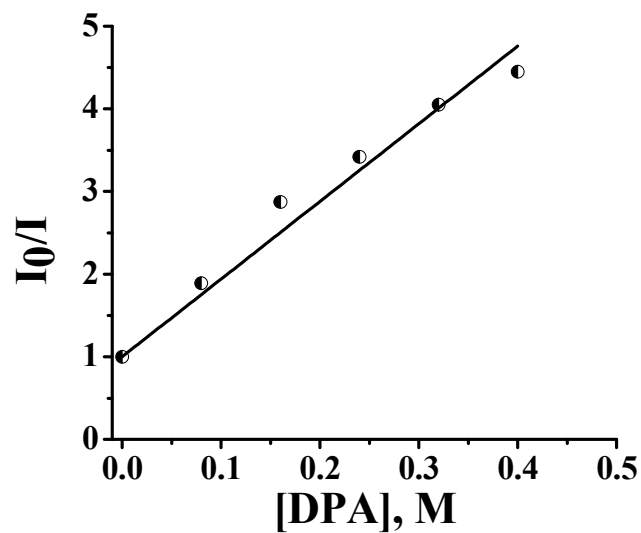

**Figure S14.** Stern-Volmer plot for steady-state luminescence quenching of GQDs in presence of  $N,N'$ -diphenylaniline. [GQDs]: 0.25 mg/mL;  $\lambda_{ex}$  = 440 nm,  $\lambda_{em}$  = 510 nm.

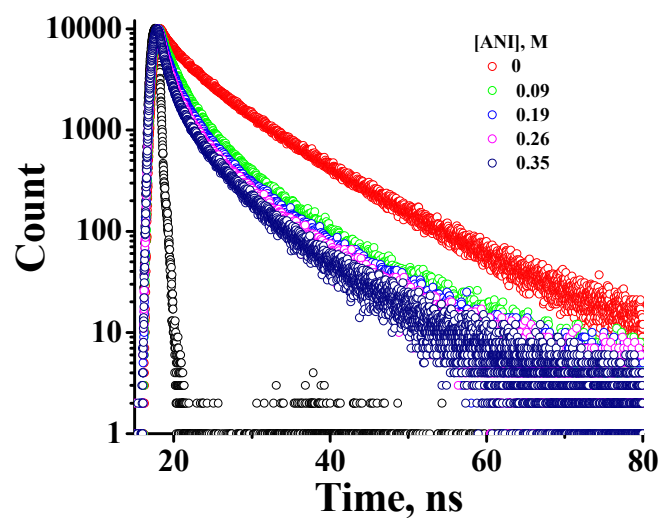

**Figure S15.** Time-resolve luminescence decay plot of GQDs in presence of aniline. [GQDs]: 0.25 mg/mL;  $\lambda_{\text{ex}}$ =444 nm,  $\lambda_{\text{em}}$ =510 nm.

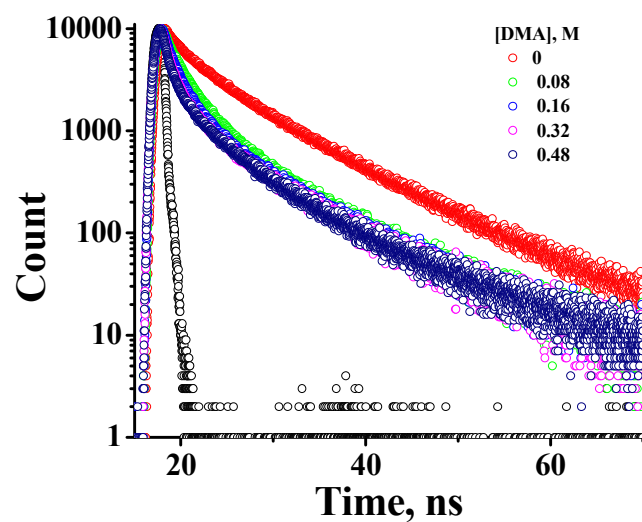

**Figure S16.** Time-resolve luminescence decay plot of GQDs in presence of *N,N'*-dimethylaniline. [GQDs]: 0.25 mg/mL;  $\lambda_{\text{ex}}$ =444 nm,  $\lambda_{\text{em}}$ =510 nm.

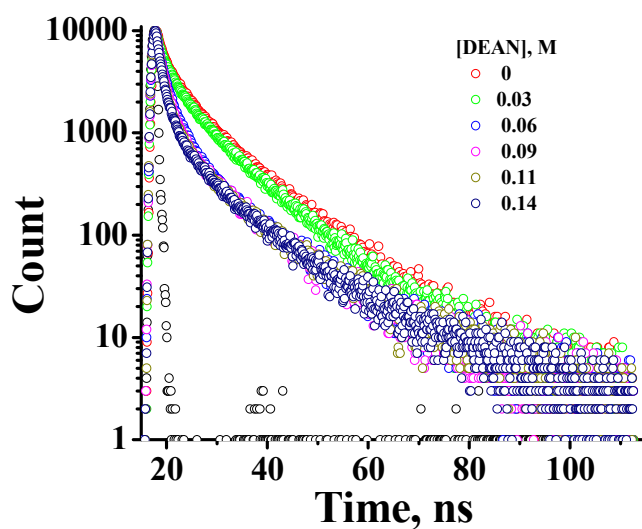

**Figure S17.** Time-resolve luminescence decay plot of GQDs in presence of *N,N'*-diethylaniline. [GQDs]: 0.25 mg/mL;  $\lambda_{\text{ex}}$ =444 nm,  $\lambda_{\text{em}}$ =510 nm.

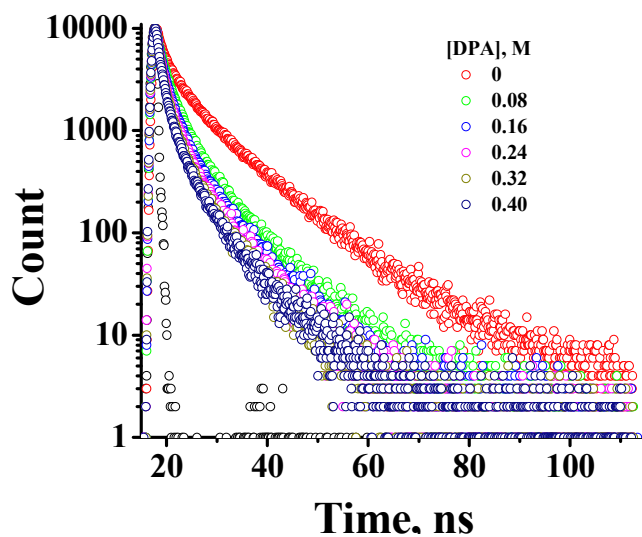

**Figure S18.** Time-resolve luminescence decay plot of GQDs in presence of *N,N'*-diphenylaniline. [GQDs]: 0.25 mg/mL;  $\lambda_{\text{ex}}$ =444 nm,  $\lambda_{\text{em}}$ =510 nm.

**Table S1:** Luminescence lifetime values of GQDs in presence of various concentrations of aniline.  $\lambda_{\text{ex}}$ : 444 nm,  $\lambda_{\text{em}}$ : 510 nm and [GQDs]: 0.25 mg/mL.

| [ANI], M | $\tau_1$ (ns)<br>$A_2$ (%) | $\tau_2$ (ns)<br>$A_3$ (%) | $\tau_{\text{av}}$ (ns) | $\chi^2$ |
|----------|----------------------------|----------------------------|-------------------------|----------|
| 0        | 4.08<br>(35.26)            | 10<br>(59)                 | 8.79                    | 1.14     |
| 0.09     | 2.25<br>(53.03)            | 7.56<br>(34.79)            | 5.82                    | 1.17     |
| 0.19     | 1.91<br>(48.27)            | 6.97<br>(34.85)            | 5.46                    | 1.12     |
| 0.26     | 1.75<br>(42.70)            | 6.45<br>(34.89)            | 5.12                    | 1.14     |
| 0.35     | 1.82<br>(40.34)            | 6.5<br>(32.05)             | 5.06                    | 1.16     |

Error:  $\pm 5\%$ ;  $\tau$ : lifetime; A: relative amplitude; the instrumental response function: 1.2 ns. The short lifetime component values have not shown in the table.

**Table S2:** Luminescence lifetime values of GQDs in presence of various concentrations of *N,N'*-dimethylaniline.  $\lambda_{\text{ex}}$ : 444 nm,  $\lambda_{\text{em}}$ : 510 nm and [GQDs]: 0.25 mg/mL.

| [DMA], M | $\tau_1$ (ns)<br>$A_2$ (%) | $\tau_2$ (ns)<br>$A_3$ (%) | $\tau_{\text{av}}$ (ns) | $\chi^2$ |
|----------|----------------------------|----------------------------|-------------------------|----------|
| 0        | 4.08<br>(35.26)            | 10<br>(59)                 | 8.79                    | 1.14     |
| 0.08     | 2.34<br>(53.05)            | 8.56<br>(36.57)            | 6.73                    | 1.09     |
| 0.16     | 2.02<br>(43.56)            | 8.44<br>(38.17)            | 6.90                    | 1.09     |
| 0.32     | 1.83<br>(32.83)            | 7.68<br>(41.97)            | 6.58                    | 1.16     |
| 0.48     | 1.96<br>(29.11)            | 7.39<br>(42.74)            | 6.38                    | 1.18     |

Error:  $\pm 5\%$ ;  $\tau$ : lifetime; A: relative amplitude; the instrumental response function: 1.2 ns. The short lifetime component values have not shown in the table.

**Table S3:** Luminescence lifetime values of GQDs in presence of various concentrations of *N,N'*-diethylaniline.  $\lambda_{\text{ex}}$ : 444 nm,  $\lambda_{\text{em}}$ : 510 nm and [GQDs]: 0.25 mg/mL.

| [DEAN], M | $\tau_1$ (ns)<br>$A_2$ (%) | $\tau_2$ (ns)<br>$A_3$ (%) | $\tau_{\text{av}}$ (ns) | $\chi^2$ |
|-----------|----------------------------|----------------------------|-------------------------|----------|
| 0         | 3.32<br>(30.24)            | 10.53<br>(58.59)           | 8.79                    | 1.08     |
| 0.03      | 2.65<br>(31.27)            | 9.68<br>(58.53)            | 8.74                    | 1.11     |
| 0.06      | 2.22<br>(47.37)            | 9.81<br>(32.39)            | 7.76                    | 1.19     |
| 0.09      | 1.73<br>(45.96)            | 8.85<br>(34.24)            | 7.26                    | 1.25     |
| 0.11      | 1.88<br>(39.91)            | 10.04<br>(33.97)           | 8.34                    | 1.17     |
| 0.14      | 1.52<br>(41.64)            | 9.32<br>(34.81)            | 7.93                    | 1.29     |

Error:  $\pm 5\%$ ;  $\tau$ : lifetime; A: relative amplitude; the instrumental response function: 1.2 ns. The short lifetime component values have not shown in the table.

**Table S4:** Luminescence lifetime values of GQDs in presence of various concentrations of *N,N'*-diphenylaniline.  $\lambda_{\text{ex}}$ : 444 nm,  $\lambda_{\text{em}}$ : 510 nm and [GQDs]: 0.25 mg/mL.

| [DPA], M | $\tau_1$ (ns)<br>$A_2$ (%) | $\tau_2$ (ns)<br>$A_3$ (%) | $\tau_{\text{av}}$ (ns) | $\chi^2$ |
|----------|----------------------------|----------------------------|-------------------------|----------|
| 0        | 3.32<br>(30.24)            | 10.53<br>(58.59)           | 8.79                    | 1.08     |
| 0.08     | 2.11<br>(48.71)            | 7.20<br>(36.26)            | 5.68                    | 1.03     |
| 0.16     | 1.73<br>(47.61)            | 6.20<br>(34.78)            | 4.88                    | 1.02     |
| 0.24     | 1.75<br>(46.86)            | 6.37<br>(28.81)            | 4.80                    | 1.14     |
| 0.32     | 1.57<br>(46.58)            | 5.73<br>(27.91)            | 4.28                    | 1.21     |
| 0.40     | 1.29<br>(46.22)            | 5.15<br>(28.90)            | 3.95                    | 1.08     |

Error:  $\pm 5\%$ ;  $\tau$ : lifetime; A: relative amplitude; the instrumental response function: 1.2 ns. The short lifetime component values have not shown in the table.

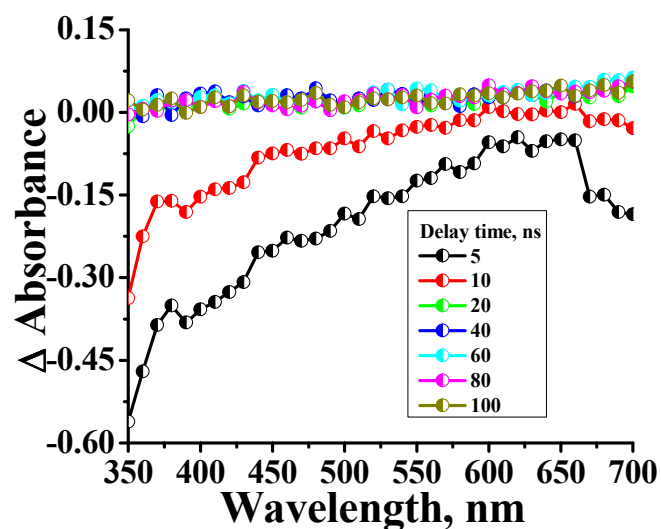

**Figure S19.** Transient difference absorption spectra GQDs (0.5 mg/mL) in presence of aniline. The plots are obtained at different time delay after the laser excitation. The delay times are shown in inset of each figure.

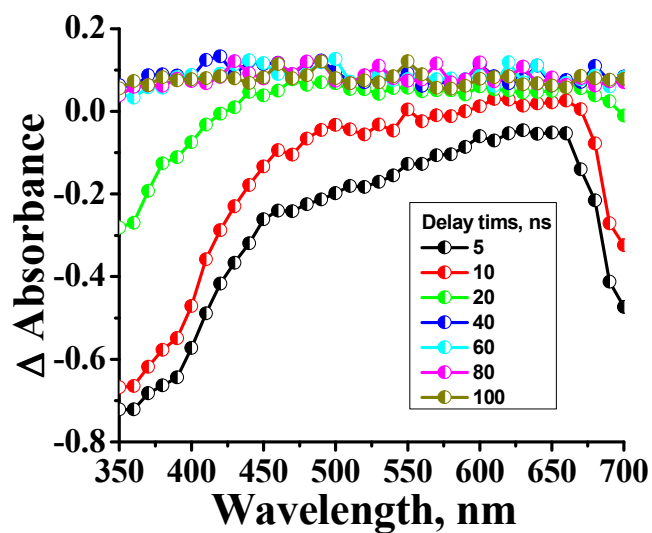

**Figure S20.** Transient difference absorption spectra GQDs (0.5 mg/mL) in presence of *N,N'*-dimethylaniline. The plots are obtained at different time delay after the laser excitation. The delay times are shown in inset of each figure.

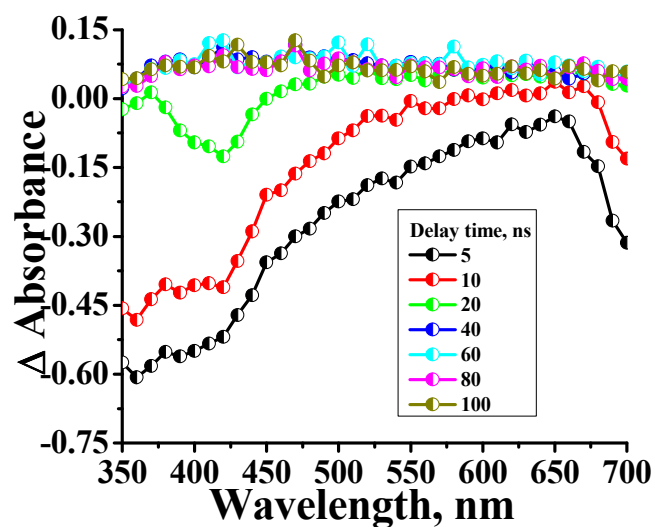

**Figure S21.** Transient difference absorption spectra GQDs (0.5 mg/mL) in presence of *N*-ethylaniline. The plots are obtained at different time delay after the laser excitation. The delay times are shown in inset of each figure.

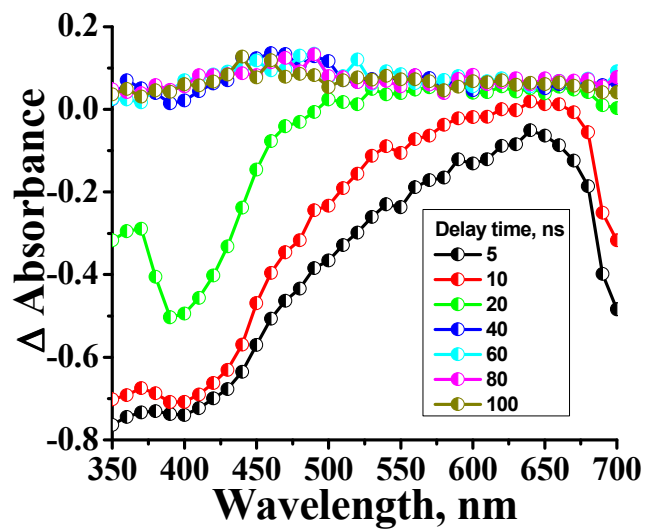

**Figure S22.** Transient difference absorption spectra GQDs (0.5 mg/mL) in presence of *N,N'*-diethylaniline. The plots are obtained at different time delay after the laser excitation. The delay times are shown in inset of each figure.



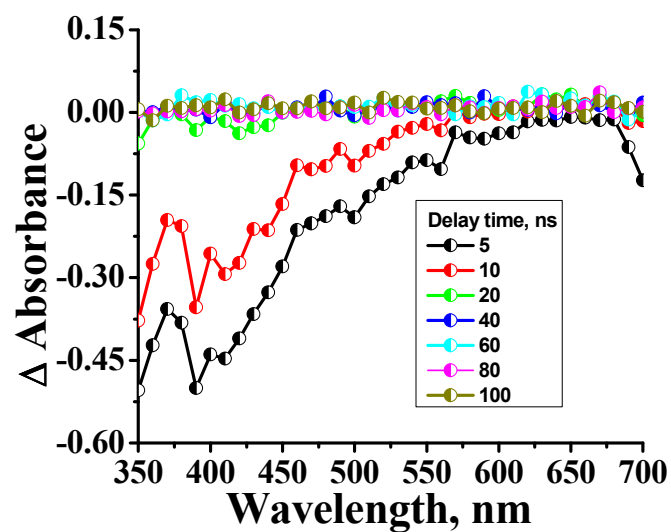

**Figure S23.** Transient difference absorption spectra GQDs (0.5 mg/mL) in presence of *N,N'*-diphenylaniline. The plots are obtained at different time delay after the laser excitation. The delay times are shown in inset of each figure.

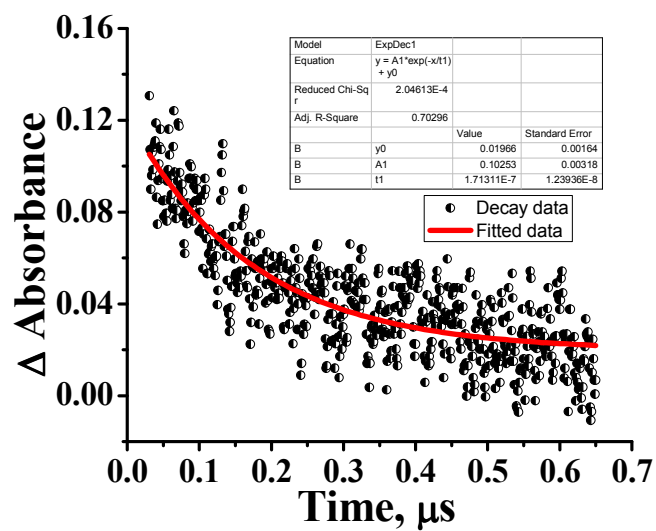

**Figure S24.** Transient decay trace probed at 430 nm for GQDs-NMA system in DMF.

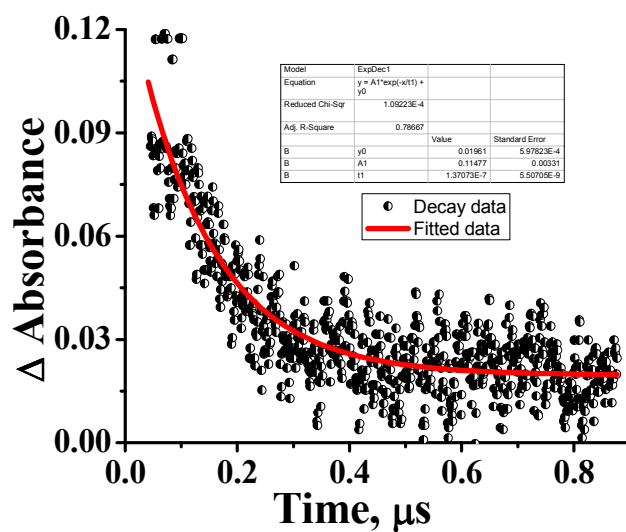

**Figure S25.** Transient decay trace probed at 425 nm for GQDs-NEA system in DMF.

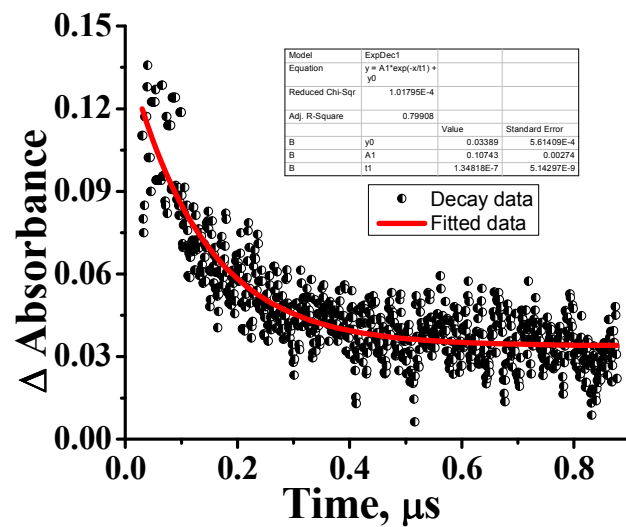

**Figure S26.** Transient decay trace probed at 455 nm for GQDs-DEAN system in DMF.

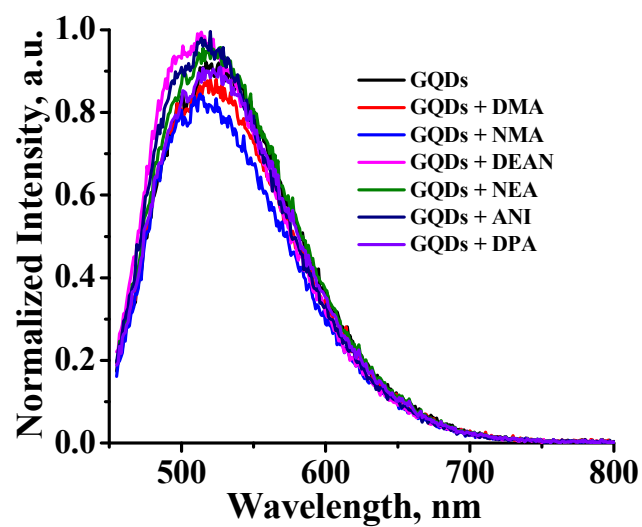

**Figure S27.** Steady-state luminescence spectra of GQDs in presence of various aniline derivatives at acidic pH (pH~2).
